# Supplementary material for: The role of Rubisco kinetics and pyrenoid morphology in shaping the CCM of haptophyte microalgae
Source: Oxford University Press journal article supplement (doi:10.1093/jxb/erx179), 2017-05-16
Supplement: erx179_suppl_supplementary_figure_s1.pdf [file erx179_suppl_supplementary_figure_s1.pdf]

## Supplemental data

### The role of Rubisco kinetics and pyrenoid morphology in shaping the CCM of Haptophyte microalgae

Ana M. C. Heureux, Jodi N. Young, Spencer M. Whitney, Maeve R. Eason-Hubbard, Renee B. Y. Lee, Robert E. Sharwood, Rosalind E. M. Rickaby

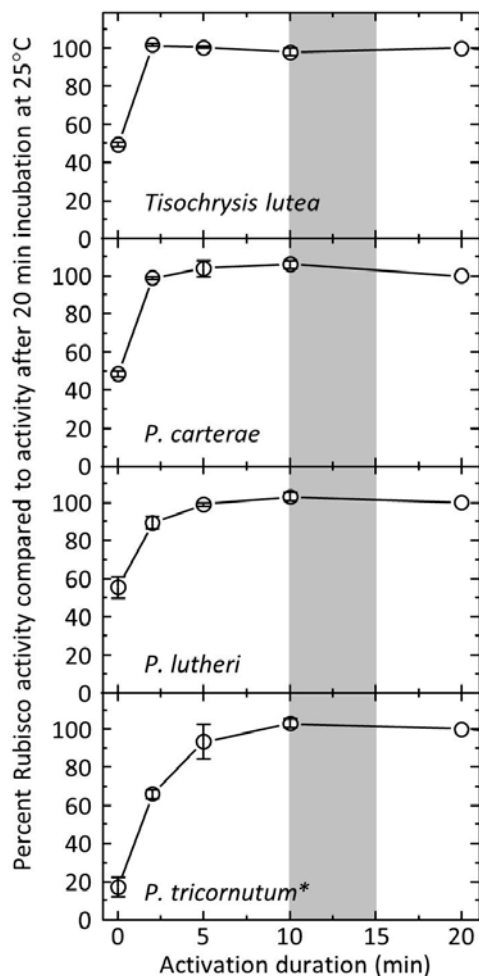

**Figure S1.** Measurement of Rubisco activation status and stability *in vitro* at 25°C.

Soluble cellular protein from the phytoplankton species indicated was rapidly extracted in CO<sub>2</sub>-free extraction buffer (containing 5 mM MgCl<sub>2</sub>) and used to measure changes in Rubisco <sup>14</sup>CO<sub>2</sub>-fixation rate after activating the extract for 0 to 20 min in buffer containing 15 mM MgCl<sub>2</sub> and 15 mM NaHCO<sub>3</sub> at 25°C. Details of the carboxylase assay are described in (Young *et al.*, 2016). Grey shading indicates the time when protein extract was assayed to quantify  $k^C_{cat}$ ,  $K_C$  and  $K_O$  (see Table 1 in main text). Data represents measures from duplicate biological samples ( $\pm$  SD). \*, data from (Young *et al.*, 2016).

#### References

Young JN, Heureux AMC, Sharwood RE, Rickaby REM, Morel FMM, Whitney SM. 2016. Large variation in the Rubisco kinetics of diatoms reveals diversity among their carbon-concentrating mechanisms. *Journal of Experimental Botany* **67**, 3445-3456.
