# Supplementary material for: The role of Rubisco kinetics and pyrenoid morphology in shaping the CCM of haptophyte microalgae
Source: Oxford University Press journal article supplement (doi:10.1093/jxb/erx179), 2017-05-16
Supplement: erx179_suppl_supplementary_table_s1.pdf [file erx179_suppl_supplementary_table_s1.pdf]

**Table S1:** Rubisco kinetics at 25°C as shown in Figure 3

|                                                         | $k_{cat}^c$<br>( $s^{-1}$ ) | $K_C$<br>( $\mu M$ ) | $K_O$<br>( $\mu M$ ) | $S_c/o$<br>( $mol.mol^{-1}$ ) | calc $k_{cat}^o$<br>( $s^{-1}$ ) | Dataset<br>reference                            |
|---------------------------------------------------------|-----------------------------|----------------------|----------------------|-------------------------------|----------------------------------|-------------------------------------------------|
| <b>Red Algae</b>                                        |                             |                      |                      |                               |                                  |                                                 |
| <i>Griffithsia monilis</i>                              | 2.6                         | 9.3                  | 467                  | 167                           | 0.8                              | Savir et. al. (2010)                            |
| <i>Galdiera sulfuraria</i>                              | 1.2                         | 3.3                  | 374                  | 166                           | 0.8                              | Savir et. al. (2010)                            |
| <i>Porphyridium cruentum</i>                            | 1.6                         | 22                   | 1574                 | 129                           | 0.9                              | Badger et. al. (1998)                           |
| <i>Cyanidium caldarium</i>                              | 1.3                         | 6.7                  | n.d.                 | n.i.                          | n.d.                             | Badger et. al. (1998)                           |
| <i>Cyanidium partita</i>                                | 1.6                         | 6.6                  | n.d.                 | n.i.                          | n.d.                             | Badger et. al. (1998)                           |
| <b>Green algae</b>                                      |                             |                      |                      |                               |                                  |                                                 |
| <i>Scenedesmus obliquus</i>                             | n.d.                        | 38                   | 660                  | 63                            | n.d.                             | Savir et. al. (2010)                            |
| <i>Chlamydomonas reinhardtii</i>                        | 5.8                         | 29                   | 480                  | 61                            | 1.57                             | Savir et. al. (2010)                            |
| <i>Euglena gracilis</i>                                 | n.d.                        | 25                   | 410                  | 54                            | n.d.                             | Savir et. al. (2010)                            |
| <b>Gymnosperms</b>                                      |                             |                      |                      |                               |                                  |                                                 |
| <i>Basal angiosperm</i>                                 |                             |                      |                      |                               |                                  |                                                 |
| <b>C<sub>3</sub></b>                                    |                             |                      |                      |                               |                                  |                                                 |
| <i>Arabidopsis thaliana</i>                             | 4.1                         | 10                   | 333                  | n.d.                          | n.d.                             | Galmes et. al. (2014)                           |
| <i>Crithmum maritimum</i>                               | 3.4                         | 9                    | 183                  | n.d.                          | n.d.                             | Galmes et. al. (2014)                           |
| <i>Dactylis glomerata</i> cv. Porto                     | 3.2                         | 11                   | 453                  | n.d.                          | n.d.                             | Galmes et. al. (2014)                           |
| <i>Eucalyptus moorei</i>                                | 3.2                         | 10                   | 285                  | n.d.                          | n.d.                             | Galmes et. al. (2014)                           |
| <i>Eucalyptus neglecta</i>                              | 2.5                         | 8                    | 230                  | n.d.                          | n.d.                             | Galmes et. al. (2014)                           |
| <i>Flaveria pringlei</i>                                | 3.1                         | 12                   | 666                  | 81                            | 2.1                              | Savir et. al. (2010)                            |
| <i>Glycine max</i>                                      | n.d.                        | 9                    | 430                  | 82                            | n.d.                             | Savir et. al. (2010)                            |
| <i>Iris douglasiana</i>                                 | 3.5                         | 10                   | 413                  | n.d.                          | n.d.                             | Galmes et. al. (2014)                           |
| <i>Limonium latebracteatum</i>                          | 2.7                         | 9                    | 344                  | n.d.                          | n.d.                             | Galmes et. al. (2014)                           |
| <i>Limonium stenophyllum</i>                            | 2.6                         | 8                    | 457                  | n.d.                          | n.d.                             | Galmes et. al. (2014)                           |
| <i>Limonium virgatum</i>                                | 2.4                         | 9                    | 381                  | n.d.                          | n.d.                             | Galmes et. al. (2014)                           |
| <i>lolium perenne</i>                                   | n.d.                        | 16                   | 500                  | 80                            | n.d.                             | Galmes et. al. (2014)                           |
| <i>Nicotiana tabacum</i>                                | 3.1                         | 10                   | 283                  | 83                            | 1.1                              | Young et. al. (2016)                            |
| <i>Pallenis maritima</i>                                | 2.7                         | 6                    | 321                  | n.d.                          | n.d.                             | Galmes et. al. (2014)                           |
| <i>Sideritis cretica</i> subsp. <i>spicata</i>          | 2.0                         | 8                    | 328                  | n.d.                          | n.d.                             | Galmes et. al. (2014)                           |
| <i>Spnacia oleracea</i>                                 | 3.7                         | 14                   | 480                  | 80                            | 1.59                             | Savir et. al. (2010)                            |
| <i>Tetragonium expnasa</i>                              | n.d.                        | 13                   | 600                  | 81                            | n.d.                             | Savir et. al. (2010)                            |
| <i>Teucrium heterophyllum</i>                           | 2.7                         | 7                    | 359                  | n.d.                          | n.d.                             | Galmes et. al. (2014)                           |
| <i>Trachycarpus fortunei</i>                            | 2.8                         | 9                    | 364                  | n.d.                          | n.d.                             | Galmes et. al. (2014)                           |
| <i>Triticum aestivum</i>                                | 2.5                         | 14                   | 730                  | 90                            | 1.5                              | Savir et. al. (2010)                            |
| <i>Triticum aestivum</i> cv. <i>Alexandria</i>          | 4.0                         | 10                   | 414                  | n.d.                          | n.d.                             | Galmes et. al. (2014)                           |
| <b>C<sub>4</sub></b>                                    |                             |                      |                      |                               |                                  |                                                 |
| <i>Amaranthus edulis</i>                                | 4.1                         | 18                   | 289                  | 77                            | 0.9                              | Whitney et. al. (2011),<br>Savir et. al. (2010) |
| <i>Amaranthus hybridus</i>                              | 3.8                         | 16                   | 640                  | 82                            | 1.9                              | Whitney et. al. (2011),<br>Savir et. al. (2010) |
| <i>Cynodon dactylon</i>                                 | 3.7                         | 21                   | n.d.                 | 89                            | n.d.                             | Whitney et al (2011)                            |
| <i>Flaveria australasica</i>                            | 3.8                         | 22                   | 309                  | 77                            | 0.7                              | Whitney et. al. (2011),<br>Savir et. al. (2010) |
| <i>Flaveria bidentis</i>                                | 4.2                         | 20                   | n.d.                 | 76                            | n.d.                             | Whitney et. al. (2011)                          |
| <i>Flaveria kochiana</i>                                | 3.7                         | 23                   | n.d.                 | 77                            | n.d.                             | Whitney et. al. (2011)                          |
| <i>Flaveria trinervia</i>                               | 4.4                         | 18                   | n.d.                 | 77                            | n.d.                             | Whitney et. al. (2011)                          |
| <i>Paspalum dilatatum</i>                               | 3.4                         | 20                   | n.d.                 | 88                            | n.d.                             | Whitney et. al. (2011)                          |
| <i>Sorghum bicolor</i>                                  | 5.4                         | 30                   | n.d.                 | 70                            | n.d.                             | Whitney et. al. (2011)                          |
| <i>Zea mays</i>                                         | 5.5                         | 19                   | 397                  | 88                            | 1.3                              | Young et. al. (2016)                            |
| <i>Zoysia japonica</i>                                  | 4.1                         | 19                   | n.d.                 | 84                            | n.d.                             | Whitney et. al. (2011)                          |
| <b>Diatoms</b>                                          |                             |                      |                      |                               |                                  |                                                 |
| <i>Thalassiosira weissflogii</i> (CCMP 1336)            | 3.2                         | 65                   | 2032                 | 79                            | 1.3                              | Young et. al. (2016)                            |
| <i>Thalassiosira oceanica</i> (CS-427)                  | 2.4                         | 65                   | 954                  | 80                            | 0.4                              | Young et. al. (2016)                            |
| <i>Skeletonema marinoi</i> (CCMP 1332)                  | 3.2                         | 68                   | 883                  | n.d.                          | n.d.                             | Young et. al. (2016)                            |
| <i>Chaetoceros calcitrans</i> (CCMP 1315)               | 2.6                         | 25                   | 413                  | 57                            | 0.8                              | Young et. al. (2016)                            |
| <i>Chaetoceros muelleri</i> (CCMP 1316)                 | 2.4                         | 23                   | 425                  | 96                            | 0.5                              | Young et. al. (2016)                            |
| <i>Chaetoceros calcitrans</i> (CS-178)                  | 3.4                         | 31                   | 490                  | 75                            | 0.7                              | Young et. al. (2016)                            |
| <i>Bellerochea</i> cf. <i>horologicalis</i> (CS-874/01) | 2.1                         | 50                   | 764                  | n.d.                          | n.d.                             | Young et. al. (2016)                            |
| <i>Phaeodactylum tricornutum</i> (UTEX 642)             | 3.2                         | 36                   | 592                  | 108                           | 0.5                              | Young et. al. (2016)                            |
| <i>Phaeodactylum tricornutum</i> (CS-29)                | 3.3                         | 41                   | 664                  | 116                           | 0.5                              | this study                                      |
| <i>Fragilariopsis cylindrus</i> (CCMP 1102)             | 3.5                         | 64                   | 667                  | 77                            | 0.5                              | Young et. al. (2016)                            |
| <i>Cylindrotheca fusiformis</i> (CS-13)                 | 3.7                         | n.d.                 | n.d.                 | 79                            | n.d.                             | Young et. al. (2016)                            |

**Haptophytes**

|                                        |     |    |      |     |     |            |
|----------------------------------------|-----|----|------|-----|-----|------------|
| <i>Pleurochrysis carterae</i> (CS-287) | 3.3 | 18 | 366  | 102 | 0.7 | this study |
| <i>Tisochrysis lutea</i> (CS-177)      | 2.2 | 24 | 800  | 89  | 0.8 | this study |
| <i>Pavlova lutheri</i> (CS-182)        | 2.5 | 15 | 1146 | 125 | 1.6 | this study |

n.d. = not determined

n.i. = not included

**References**

**Badger MRT, Andrews J, Whitney SM, Ludwig M, Yellowlees DC, Leggat W, Price GD (1998)**

The diversity and coevolution of Rubisco, plastids, pyrenoids, and chloroplast-based CO<sub>2</sub>-concentrating mechanisms in algae. *Canadian Journal of Botany* **76**: 1052-1071

**Galmes J, Kapralov MV, Andralojc PJ, Conesa MÀ, Keys AJ, Parry MAJ, Flexas J (2014)**

Expanding knowledge of the Rubisco kinetics variability in plant species: environmental and evolutionary trends. *Plant, Cell & Environment* **37**: 1989-2001

**Savir Y, Noor E, Milo R, Tlustý T (2010)** Cross-species analysis traces adaptation of Rubisco

toward optimality in a low-dimensional landscape. *Proceedings of the National Academy of Sciences* **107**: 3475-3480

**Whitney SM, Houtz RL, Alonso H (2011)** Advancing Our Understanding and Capacity to Engineer

Nature's CO<sub>2</sub>-Sequestering Enzyme, Rubisco. *Plant Physiology* **155**: 27-35

**Young, J. N., Heureux, A. M., Sharwood, R. E., Rickaby, R. E., Morel, F. M., & Whitney, S. M.**

(2016). Large variation in the Rubisco kinetics of diatoms reveals diversity among their carbon-concentrating mechanisms. *Journal of Experimental Botany*, **67**(11): 3445-3456.
